# Supplementary material for: Fabrication of Woven Jute Fiber Epoxy Bio-Composites through the Epoxy/Thiol-Ene Photopolymerization Technique
Source: MDPI journal article supplement (doi:10.3390/polym15010060), 2022-12-23
Supplement: s1 [file s1]

# Fabrication of Woven Jute Fiber Epoxy Bio-Composites through the Epoxy/Thiol-Ene Photopolymerization Technique

Ricardo Acosta Ortiz\*, Roberto Yañez Macías, José de Jesús Ku Herrera and Aida Esmeralda García Valdez

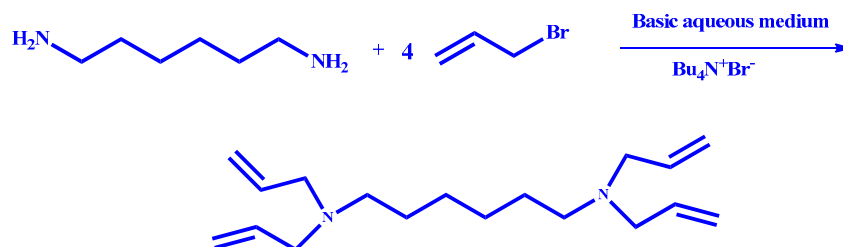

(a) The method to prepare the ALA4 is described in reference 34.

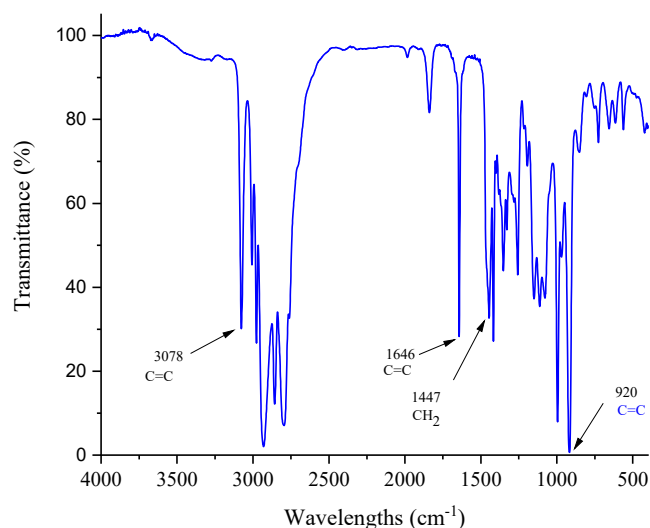

(b) FTIR spectrum of ALA4.

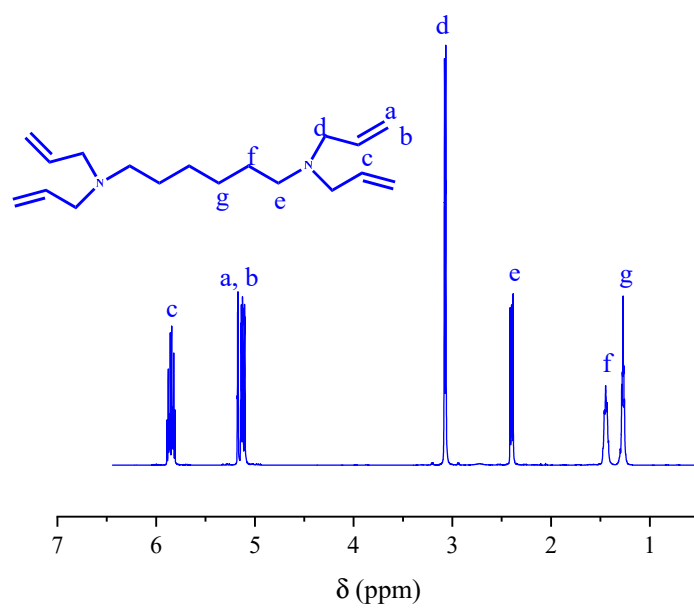

(c) <sup>1</sup>H NMR Spectrum of ALA4.

**Figure S1.** Synthesis and characterization of N1, N1, N6, N6-tetraallyl hexane-1,6-diamine (ALA4).

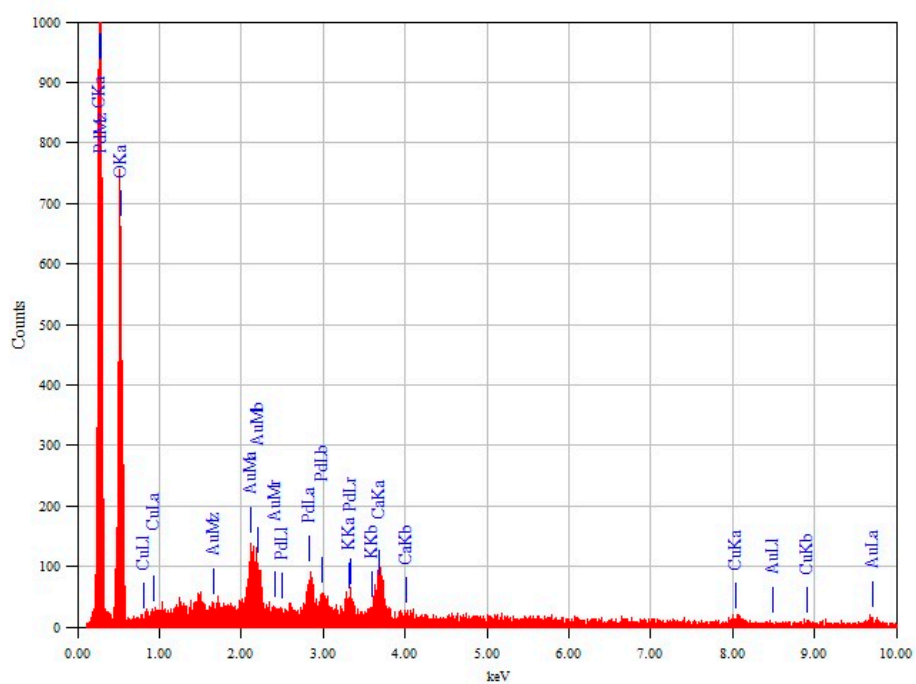

(a) EDS spectrum of the NF WJF

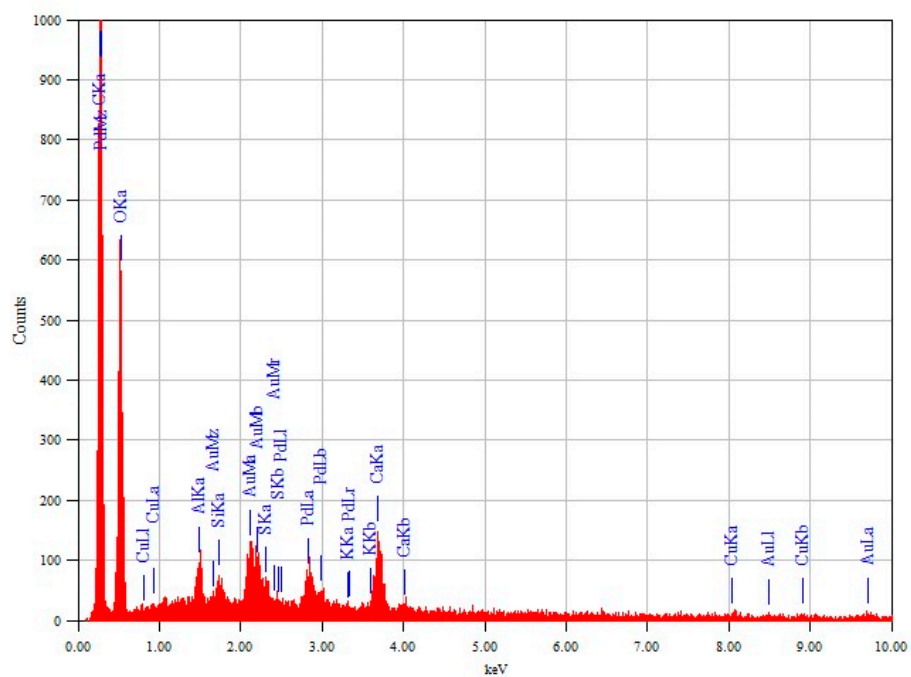

(b) EDS spectrum of the SH WJF.

Figure S2. EDS Results.

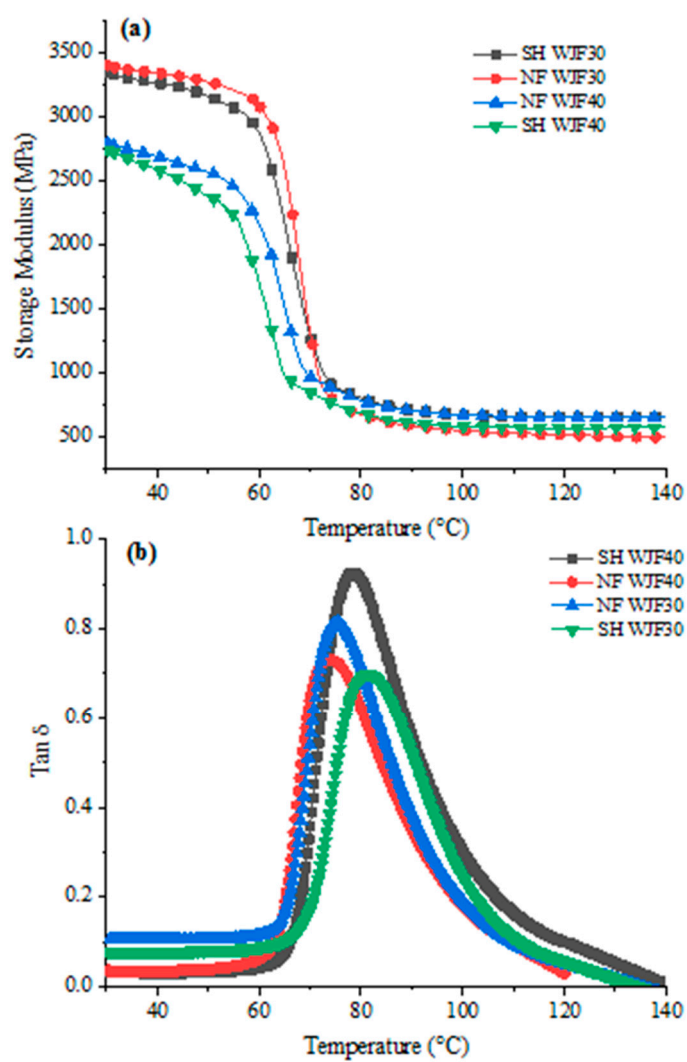

**Figure S3.** DMA results of the obtained bio-composites: (a) Storage Modulus vs. temperature curve; (b) Tan  $\delta$  vs. Temperature curves.
